# Supplementary material for: Water quality indicators influencing the formation and morphology of hydrostatically-formed photogranules
Source: Royal Society of Chemistry journal article supplement (doi:10.1039/d4va00054d), 2024-01-01
Supplement: d4va00054d1.pdf [file d4va00054d1.pdf]

1  
2  
3  
4  
5  
6  
7  
8  
9  
10  
11  
12  
13  
14  
15  
16  
17  
18  
19  
20  
21  
22  
23

Supplemental Material for

**Water quality indicators influencing the formation and morphology of hydrostatically-  
formed photogranules**

Cynthia J. Castro<sup>†,‡</sup>, W. Camilla Kuo-Dahab<sup>†</sup>, Tao Jiang<sup>†</sup>, Sam Downes<sup>†</sup>, Guoping Zhang<sup>†</sup>,  
Ahmed S. Abouhend<sup>†</sup>, Caitlyn S. Butler<sup>†,\*</sup>

<sup>†</sup> University of Massachusetts Amherst, Department of Civil & Environmental Engineering, 18  
Marston Hall, 130 Natural Resources Road, Amherst, MA, 01003

<sup>‡</sup> Wade Trim, 201 N Franklin St., Suite 1350, Tampa, FL 33602

\*Corresponding Author ([csbutler@umass.edu](mailto:csbutler@umass.edu))

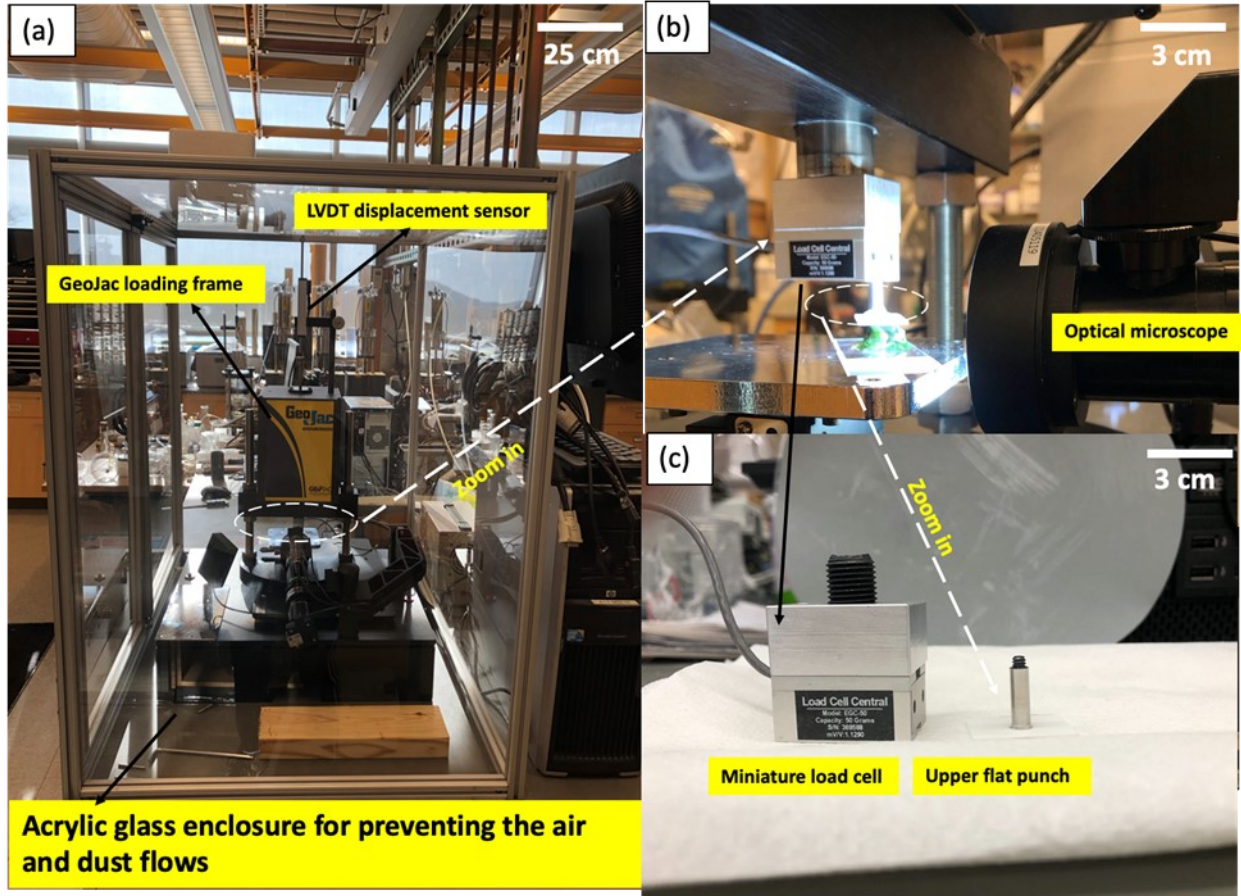

24

25 **Fig. S1.** Experimental set up for the compression testing of individual OPGs: (a) the GeoJac  
26 loading frame placed in the acrylic glass enclosure; (b) OPG being compressed under the  
27 observation of an optical microscope; (c) close-up of miniature loading cell and the upper flat  
28 punch that compress the individual OPGs.

29

30

31

32

33

34

35

36

37

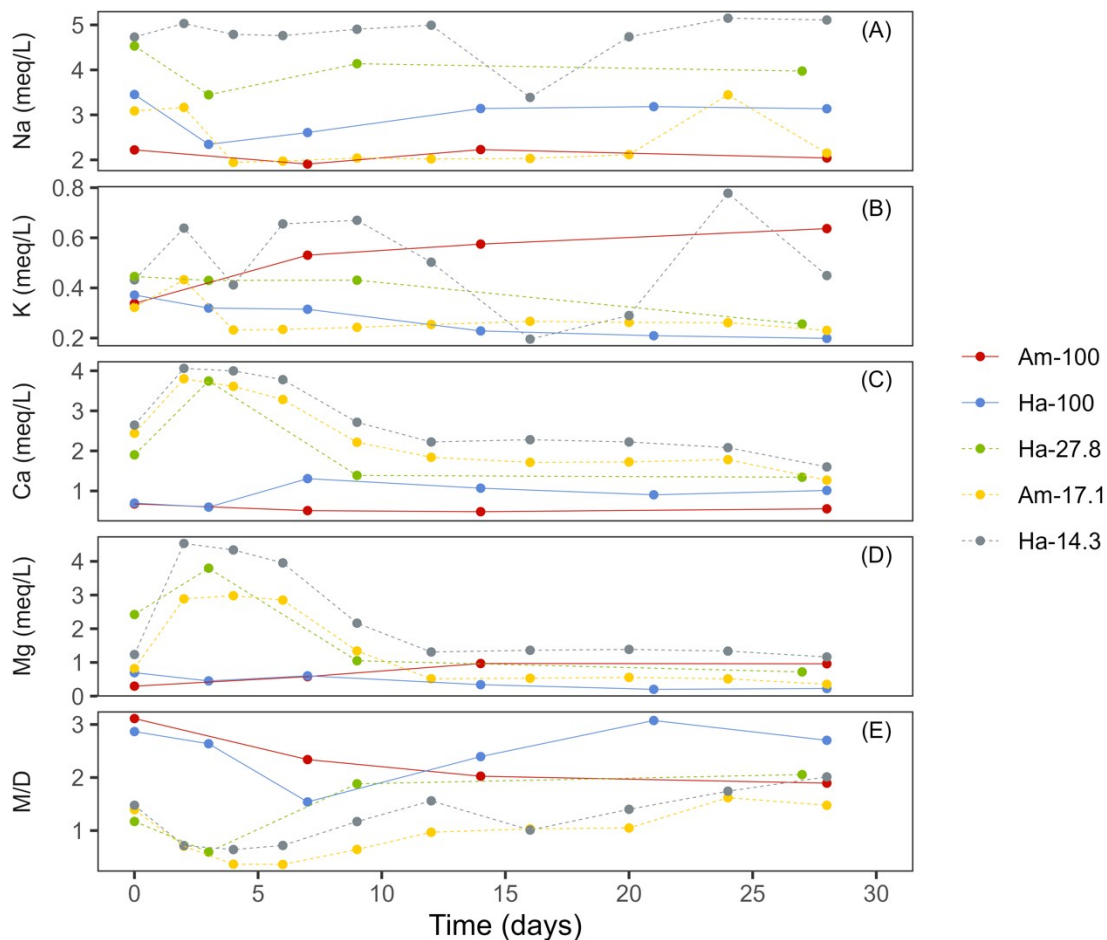

38

39 **Fig. S2.** Changes in cations concentrations during the granulation process. (A)  $\text{Na}^+$ , (B)  $\text{K}^+$ , (C)  
 40  $\text{Ca}^{2+}$ , and (D)  $\text{Mg}^{2+}$ , and (E) the ratio of the monovalent to divalent cations, M/D. All  
 41 concentrations as meq/L. The solid lines represent data from cultivations dominated by spherical  
 42 granules, while the dashed lines represent data from cultivations dominated by disk-shaped  
 43 granules.

44

45

46

47

48

49

50

51

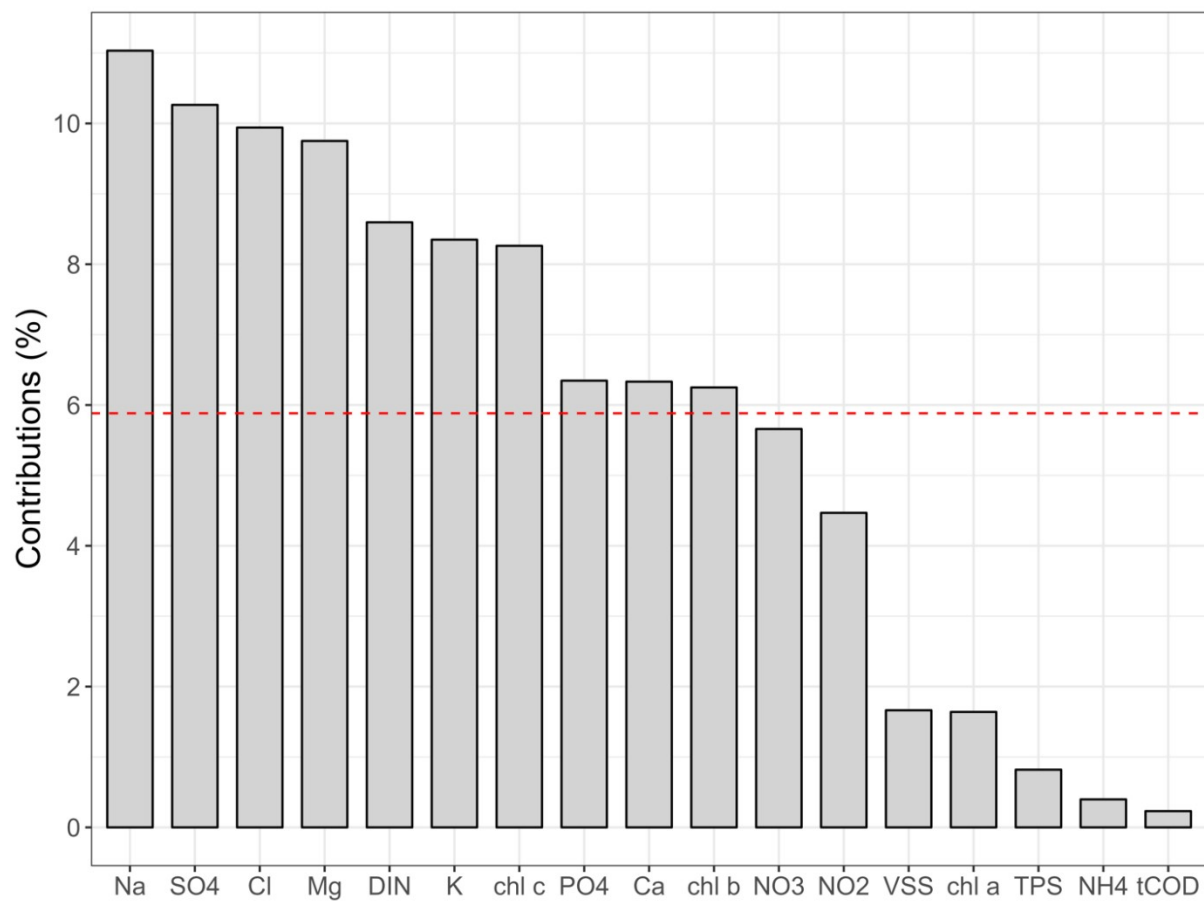

52

53 **Fig. S3.** Contributing variables to PC1.

54

55

56

57

58

59

60

61

62

63

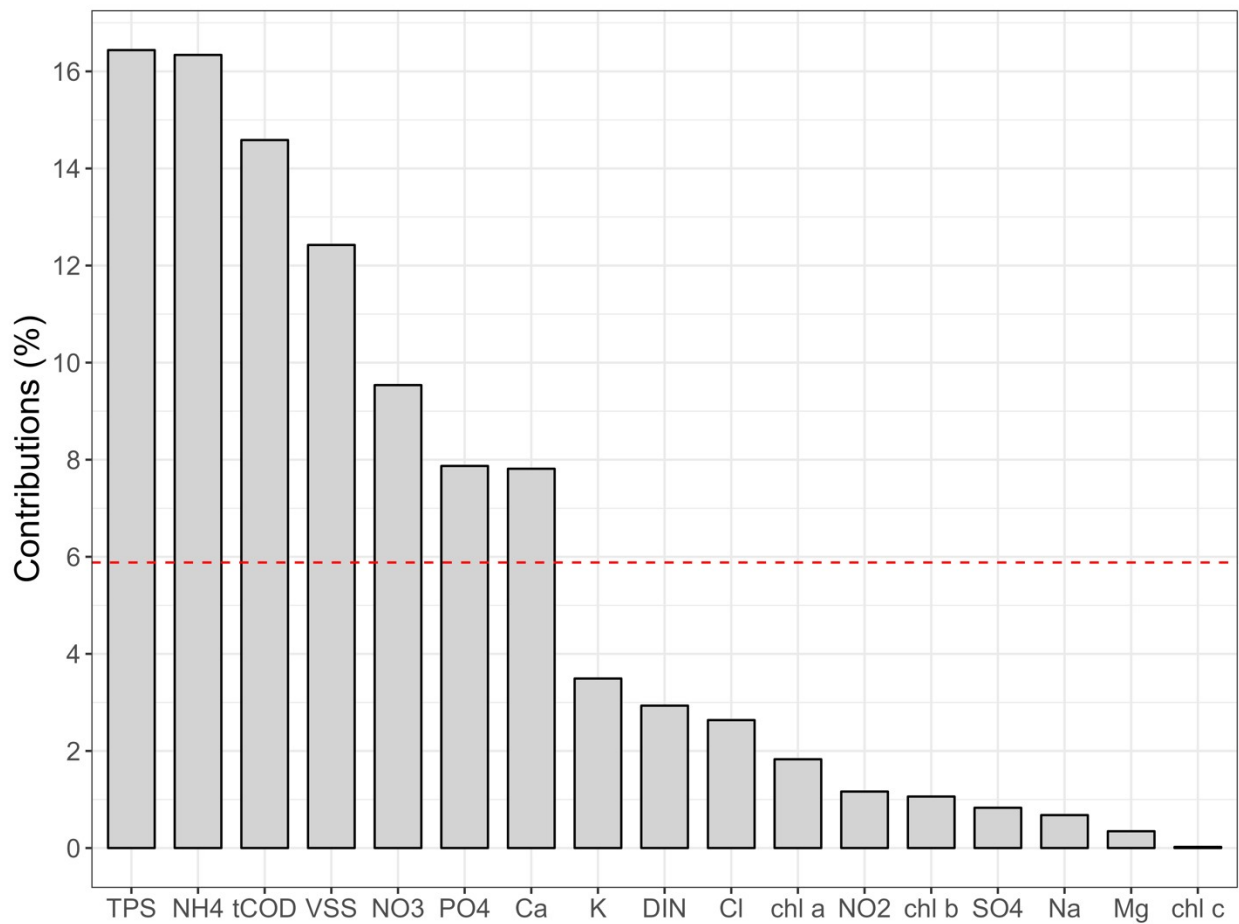

64

65 **Fig. S4.** Contributing variables to PC2.

66

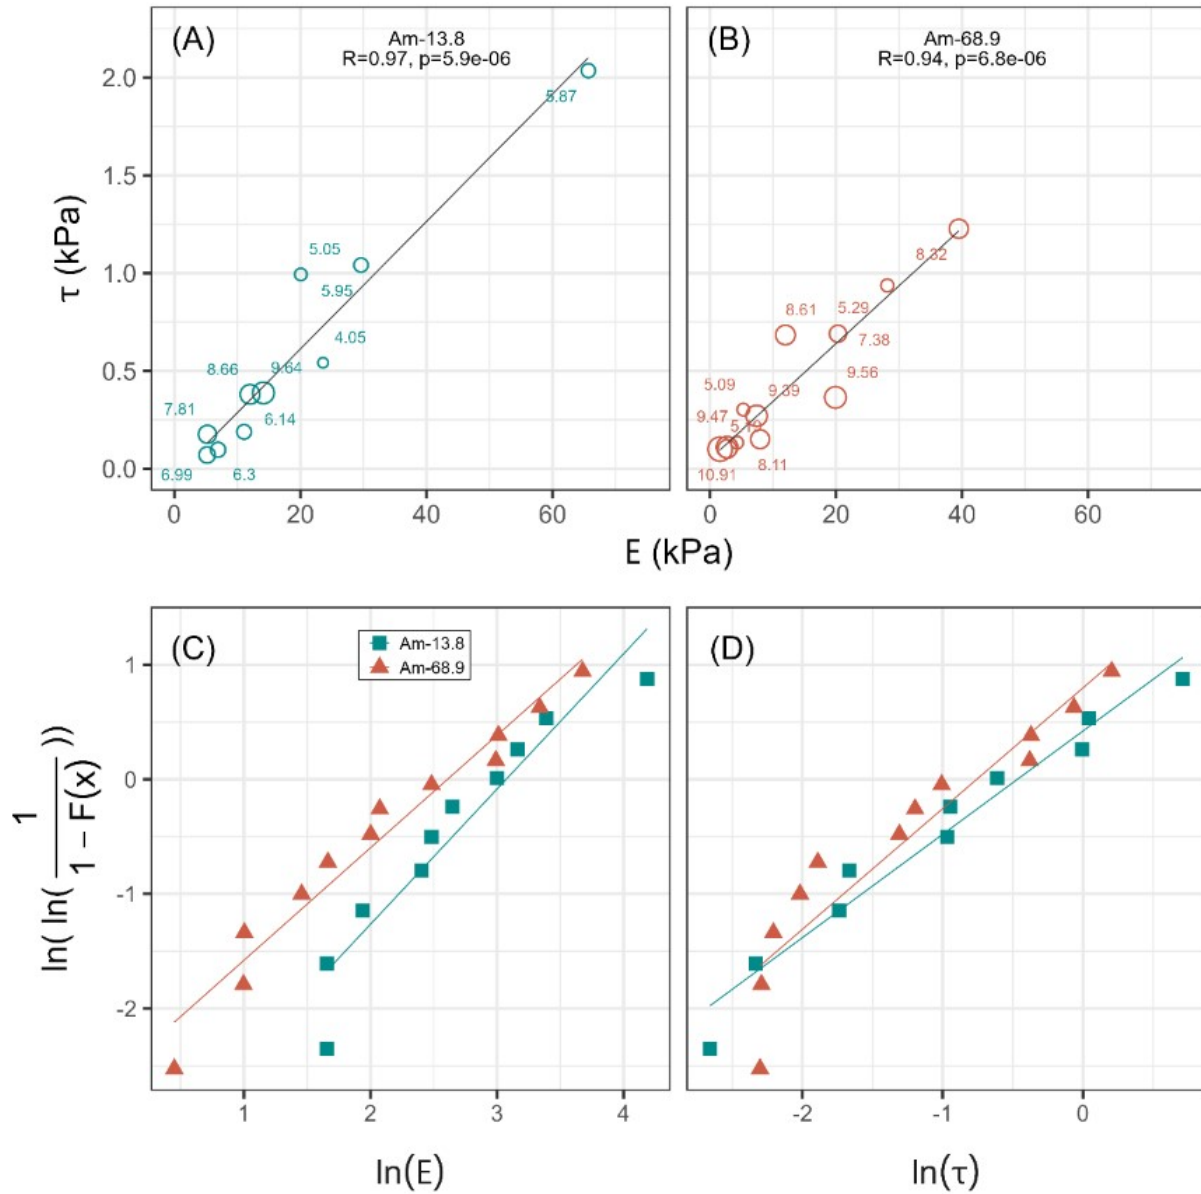

67

68 **Fig. S5.** The yield shear stress,  $\tau_y$  versus the elastic modulus,  $E$ , for representative photogranules  
 69 where the cultivations developed into A) majority disks (Am-13.8) or B) majority spheres (Am-  
 70 68.9). The nominal diameter of each photogranule is shown above the marker in mm and the  
 71 marker size is representative of the nominal diameter of each photogranule. Linearized two  
 72 parameter Weibull distribution are also depicted for C)  $E$  and D)  $\tau_y$  for cultivations Am-13.8 and  
 73 Am-68.9.

74
